# Supplementary material for: Radar remote sensing-based inversion model of soil salt content at different depths under vegetation
Source: PeerJ. 2022 Apr 26;10:e13306. doi: 10.7717/peerj.13306 (PMC9053309; doi:10.7717/peerj.13306)
Supplement: Supplemental Information 1 [file peerj-10-13306-s001.xlsx]

## Sheet: Sheet1
sampling points	East Longitude	North latitude
1	107.172	40.9001
2	107.17	40.8997
3	107.17	40.901
4	107.168	40.8991
5	107.167	40.8995
6	107.167	40.901
7	107.167	40.9005
8	107.168	40.9008
9	107.168	40.9013
10	107.169	40.8998
11	107.172	40.9004
12	107.172	40.9009
13	107.172	40.901
14	107.172	40.9017
15	107.172	40.9021
16	107.171	40.9021
17	107.168	40.9003
18	107.169	40.9017
19	107.17	40.9019
20	107.171	40.901
21	107.17	40.9017
22	107.169	40.9019
23	107.171	40.9015
24	107.17	40.9005
25	107.168	40.9013
26	107.169	40.9006
27	107.17	40.9
28	107.171	40.9006
29	107.167	40.899
30	107.167	40.9
31	107.15	40.9751
32	107.148	40.9754
33	107.149	40.9737
34	107.148	40.974
35	107.15	40.9745
36	107.15	40.9741
37	107.15	40.9757
38	107.148	40.976
39	107.148	40.9757
40	107.149	40.9753
41	107.146	40.9738
42	107.147	40.9745
43	107.147	40.9747
44	107.147	40.9744
45	107.146	40.9742
46	107.147	40.973
47	107.149	40.9748
48	107.15	40.9759
49	107.148	40.9763
50	107.149	40.9761
51	107.147	40.9741
52	107.146	40.9743
53	107.148	40.9751
54	107.149	40.9732
55	107.149	40.974
56	107.15	40.9734
57	107.147	40.9734
58	107.15	40.9752
59	107.147	40.9765
60	107.147	40.9757
61	107.106	41.0009
62	107.106	41.0025
63	107.108	41.0028
64	107.105	41.0017
65	107.106	41.0023
66	107.108	41.002
67	107.106	41.0016
68	107.107	41.0016
69	107.11	41.0002
70	107.109	41.001
71	107.108	41.0001
72	107.108	41.0013
73	107.108	40.9994
74	107.109	40.9992
75	107.109	41.0005
76	107.107	41.0023
77	107.11	41.0017
78	107.106	41.0018
79	107.105	41.0021
80	107.109	41.0025
81	107.111	41.0013
82	107.107	41.0033
83	107.107	41.0008
84	107.107	41.0013
85	107.109	41.0002
86	107.108	41.0008
87	107.106	41.0026
88	107.11	41.0008
89	107.11	41.0015
90	107.108	41.0031
91	107.163	41.0119
92	107.163	41.0107
93	107.162	41.01
94	107.162	41.0112
95	107.163	41.0115
96	107.162	41.0107
97	107.161	41.0099
98	107.16	41.0116
99	107.161	41.0124
100	107.161	41.0111
101	107.161	41.0105
102	107.161	41.0116
103	107.16	41.0122
104	107.16	41.0127
105	107.162	41.0126
106	107.164	41.0107
107	107.161	41.0092
108	107.162	41.0118
109	107.162	41.0099
110	107.163	41.0101
111	107.159	41.0124
112	107.16	41.0112
113	107.164	41.0111
114	107.163	41.0126
