# Supplementary material for: Radar remote sensing-based inversion model of soil salt content at different depths under vegetation
Source: PeerJ. 2022 Apr 26;10:e13306. doi: 10.7717/peerj.13306 (PMC9053309; doi:10.7717/peerj.13306)
Supplement: Supplemental Information 5 — The measured and estimated values of the soil salt content at seven different depths for the ELM modelling. [file peerj-10-13306-s005.xlsx]

## Sheet: Sheet1
ELM model
0-10		10-20		0-20		20-40		0-40		40-60		0-60
MV	EV	MV	EV	MV	EV	MV	EV	MV	EV	MV	EV	MV	EV
0.07388	0.30519	0.0772	0.11983	0.07475	0.41901	0.07388	0.38013	0.07014	0.08971	0.07446	0.55325	0.0759	1.29287
0.07792	0.62356	0.08108	0.11076	0.0759	0.87094	0.07633	0.15864	0.07331	0.09875	0.08166	0.24144	0.08915	0.25781
0.08454	0.20447	0.08324	0.13629	0.07763	0.23317	0.07921	0.00891	0.0782	0.29002	0.08684	0.25572	0.09347	0.21459
0.08713	0.24221	0.09145	0.28821	0.07993	0.18634	0.08526	0.03903	0.07907	0.24306	0.09246	0.24962	0.0998	0.2285
0.09174	0.13834	0.09448	0.18161	0.09145	0.1741	0.08987	0.17931	0.09145	0.20685	0.09779	0.2694	0.1024	0.25981
0.09404	0.0796	0.10081	0.16314	0.10038	0.13416	0.10081	0.17979	0.09808	0.26821	0.10902	0.19033	0.10988	0.22478
0.09865	0.23562	0.10916	0.37653	0.10124	0.2353	0.10398	0.21807	0.11046	0.22348	0.11608	0.2172	0.12256	0.20919
0.10499	0.28794	0.11089	0.38936	0.10268	0.13659	0.10744	0.2305	0.11363	0.26132	0.12385	0.26694	0.12716	0.23025
0.11075	0.33591	0.11492	0.24791	0.10355	0.08278	0.11161	0.3699	0.1168	0.21179	0.12673	0.36581	0.13033	0.22184
0.1191	0.33361	0.12803	0.12805	0.11075	0.28023	0.11737	0.21797	0.11996	0.21385	0.1299	0.25164	0.13465	0.14981
0.12572	0.32195	0.13264	0.18031	0.11305	0.12801	0.12313	0.22513	0.13206	0.17805	0.13609	0.24491	0.13667	0.25475
0.1384	0.237	0.14214	0.0439	0.13004	0.27914	0.13379	0.12637	0.14358	0.17562	0.14113	0.25201	0.14934	0.25434
0.14099	0.27512	0.14704	0.24229	0.14156	0.16274	0.14286	0.10922	0.14646	0.26381	0.14905	0.2774	0.15856	0.54655
0.15481	0.10953	0.16403	0.33963	0.14588	0.11439	0.1492	0.24441	0.15308	0.53016	0.17656	0.26235	0.16547	0.19366
0.16115	0.17046	0.16576	0.78304	0.15308	0.17739	0.16417	0.39055	0.17065	0.20265	0.17929	0.26411	0.17411	0.19247
0.1695	0.15238	0.17483	0.35226	0.16288	0.15671	0.17483	0.22912	0.17814	0.33719	0.18462	0.24002	0.19484	0.26323
0.18073	0.21461	0.1839	0.20129	0.16806	0.1638	0.18462	0.18781	0.18246	0.29496	0.20262	0.13847	0.20118	0.26068
0.18736	0.21487	0.18908	0.25829	0.1767	0.13247	0.1898	0.20115	0.19571	0.17778	0.20809	0.22239	0.20608	0.16535
0.19657	0.14573	0.20608	0.41163	0.18764	0.15149	0.19556	0.22961	0.20579	0.2208	0.21097	0.3129	0.21414	0.30246
0.21356	0.25937	0.2176	0.21034	0.19283	0.06374	0.20982	0.24301	0.21241	0.39475	0.2176	0.20438	0.2248	0.22623
0.2199	0.24287	0.22465	0.28603	0.19859	0.40166	0.21961	0.2233	0.21875	0.29223	0.22523	0.23173	0.23344	0.29034
0.23516	0.18317	0.23761	0.05937	0.21472	0.39227	0.22883	0.16121	0.23228	0.28413	0.23704	0.27726	0.24064	0.43039
0.25014	0.27585	0.25648	0.44239	0.23344	0.29278	0.23473	0.21398	0.2392	0.46266	0.25777	0.2528	0.26425	0.44397
0.26454	0.28859	0.26598	0.30249	0.24006	0.34216	0.2366	0.21624	0.25936	0.46007	0.27174	0.27441	0.27923	0.3299
0.28902	0.27345	0.29118	0.30695	0.26166	0.16567	0.2631	0.23024	0.27088	0.22798	0.2991	0.27713	0.29737	0.68581
0.29766	0.02799	0.31292	0.16843	0.27779	0.32434	0.27606	0.41595	0.27577	0.63348	0.30659	0.31619	0.30947	0.31305
0.30428	0.17659	0.33769	0.32018	0.31033	0.30295	0.31998	0.29427	0.29334	0.3182	0.31264	0.29015	0.33683	0.24318
0.33654	0.27945	0.3544	0.29017	0.3112	0.42095	0.34043	0.23391	0.31724	0.23118	0.32344	0.31764	0.34806	0.45431
0.37196	0.27103	0.37369	0.33909	0.34115	0.12128	0.35036	0.29903	0.35468	0.44324	0.36606	0.32506	0.35468	0.24189
0.37888	0.38234	0.42049	0.31144	0.3495	0.226	0.37009	0.21744	0.37657	0.24477	0.37499	0.35938	0.37801	0.29829
0.39328	0.32497	0.4372	0.18259	0.41286	0.48709	0.40868	0.15462	0.395	0.3276	0.39083	0.26998	0.39385	0.18693
0.4215	0.18359	0.48529	0.228	0.43734	0.20157	0.43475	0.24644	0.43504	0.18748	0.40278	0.46415	0.40739	0.31872
0.45116	0.91916	0.58494	0.35887	0.45462	0.32526	0.48299	0.36265	0.46412	0.2862	0.44728	0.26164	0.44252	1.02768
0.53814	0.27628	0.66356	0.17665	0.4791	0.2842	0.50804	0.15994	0.47334	0.03963	0.46427	0.37921	0.45923	0.30301
0.71238	0.39195	0.83478	0.62378	0.62598	0.50562	0.55686	0.26188	0.54332	0.3278	0.51121	0.26897	0.4791	1.1291
0.82758	0.32051	1.0623	0.37916	0.86502	0.63558	0.7887	0.274	0.58105	0.60728	0.54808	0.25321	0.56924	0.27029
0.6046	0.7371	1.25556	1.15882	1.32662	1.10634	0.86848	0.23467	0.74118	0.27562	0.74881	0.25534	0.70374	0.43193
1.1638	1.2475	1.34614	1.25549	1.49862	1.20579	1.18203	0.39987	0.93856	0.43388	1.20233	0.40214	1.20896	0.6346
	Note:	EV: estimated value
		MV: measured value
