# Supplementary material for: Radar remote sensing-based inversion model of soil salt content at different depths under vegetation
Source: PeerJ. 2022 Apr 26;10:e13306. doi: 10.7717/peerj.13306 (PMC9053309; doi:10.7717/peerj.13306)
Supplement: Supplemental Information 6 — The measured and estimated values of the soil salt content at seven different depths for the SVM modelling. [file peerj-10-13306-s006.xlsx]

## Sheet: Sheet1
SVM model
0-10		10-20		0-20		20-40		0-40		40-60		0-60
MV	EV	MV	EV	MV	EV	MV	EV	MV	EV	MV	EV	MV	EV
0.07388	0.18346	0.0772	0.54615	0.07475	0.42549	0.07388	0.36004	0.07014	0.23746	0.07446	0.68615	0.0759	0.73319
0.07792	0.18263	0.08108	0.14195	0.0759	0.05003	0.07633	0.0496	0.07331	0.11629	0.08166	0.50795	0.08915	0.08887
0.08454	0.10975	0.08324	0.16239	0.07763	0.01756	0.07921	0.3481	0.0782	0.18717	0.08684	0.23953	0.09347	0.31313
0.08713	-0.05758	0.09145	0.14084	0.07993	0.18984	0.08526	0.06605	0.07907	0.20978	0.09246	0.24361	0.0998	0.18267
0.09174	0.18343	0.09448	0.17687	0.09145	0.17151	0.08987	0.11485	0.09145	0.15935	0.09779	0.02794	0.1024	0.20129
0.09404	0.29273	0.10081	0.20776	0.10038	0.22048	0.10081	0.20858	0.09808	0.22673	0.10902	0.19163	0.10988	0.19811
0.09865	0.30128	0.10916	0.10328	0.10124	0.18846	0.10398	0.07687	0.11046	0.25515	0.11608	0.21312	0.12256	0.2096
0.10499	0.31754	0.11089	0.18186	0.10268	0.21993	0.10744	0.35076	0.11363	0.25394	0.12385	0.65764	0.12716	0.21297
0.11075	0.29528	0.11492	0.20971	0.10355	0.14253	0.11161	0.26239	0.1168	0.16151	0.12673	0.31643	0.13033	0.2417
0.1191	0.18505	0.12803	0.22174	0.11075	0.25347	0.11737	0.22132	0.11996	0.16801	0.1299	0.05393	0.13465	0.19937
0.12572	0.27824	0.13264	0.24098	0.11305	0.12931	0.12313	0.18608	0.13206	0.14444	0.13609	0.20216	0.13667	0.15826
0.1384	0.09773	0.14214	0.15399	0.13004	0.1786	0.13379	0.08608	0.14358	0.14554	0.14113	0.25581	0.14934	0.23786
0.14099	0.1479	0.14704	0.22179	0.14156	0.11925	0.14286	0.314	0.14646	0.2243	0.14905	0.27747	0.15856	0.23823
0.15481	0.23535	0.16403	0.12857	0.14588	0.14627	0.1492	0.08109	0.15308	0.25353	0.17656	0.26108	0.16547	0.46194
0.16115	0.17022	0.16576	0.24331	0.15308	0.18365	0.16417	0.19783	0.17065	0.19339	0.17929	0.24983	0.17411	0.17491
0.1695	0.2223	0.17483	0.23185	0.16288	0.17965	0.17483	0.16784	0.17814	0.26977	0.18462	0.20539	0.19484	0.18996
0.18073	0.13166	0.1839	0.26199	0.16806	0.21478	0.18462	0.0498	0.18246	0.21692	0.20262	0.17944	0.20118	0.29932
0.18736	0.2604	0.18908	0.20674	0.1767	0.16836	0.1898	0.22003	0.19571	0.18419	0.20809	0.20138	0.20608	0.25033
0.19657	0.2509	0.20608	0.24417	0.18764	0.15754	0.19556	0.19531	0.20579	0.53377	0.21097	0.28473	0.21414	0.16427
0.21356	0.17873	0.2176	0.15044	0.19283	0.20487	0.20982	0.14265	0.21241	0.61626	0.2176	0.18201	0.2248	0.36717
0.2199	0.23551	0.22465	0.35984	0.19859	0.40182	0.21961	0.13863	0.21875	0.25539	0.22523	0.22277	0.23344	0.20033
0.23516	0.36297	0.23761	0.21215	0.21472	0.41585	0.22883	0.21846	0.23228	0.23867	0.23704	0.29034	0.24064	0.20993
0.25014	0.26053	0.25648	0.16687	0.23344	0.18229	0.23473	0.10422	0.2392	0.28744	0.25777	0.21059	0.26425	0.38169
0.26454	-0.02043	0.26598	0.08764	0.24006	0.38656	0.2366	0.13681	0.25936	0.20789	0.27174	0.27636	0.27923	0.38453
0.28902	0.18399	0.29118	0.45927	0.26166	0.20242	0.2631	0.14782	0.27088	0.21243	0.2991	0.28083	0.29737	0.30867
0.29766	0.2676	0.31292	0.23519	0.27779	0.15914	0.27606	0.24015	0.27577	0.08636	0.30659	0.28155	0.30947	0.56999
0.30428	0.22419	0.33769	0.17486	0.31033	0.30732	0.31998	0.13825	0.29334	0.15421	0.31264	0.29558	0.33683	0.32198
0.33654	0.03703	0.3544	0.21119	0.3112	0.21514	0.34043	0.18962	0.31724	0.24803	0.32344	0.28916	0.34806	0.21869
0.37196	0.31344	0.37369	0.2307	0.34115	0.32145	0.35036	0.25371	0.35468	0.28974	0.36606	0.25292	0.35468	0.39068
0.37888	0.08059	0.42049	0.23711	0.3495	0.17792	0.37009	0.31754	0.37657	0.28865	0.37499	0.30492	0.37801	0.24996
0.39328	0.88364	0.4372	0.19788	0.41286	0.60428	0.40868	0.21307	0.395	0.31262	0.39083	0.45255	0.39385	0.2967
0.4215	0.23039	0.48529	0.18059	0.43734	0.05956	0.43475	0.38714	0.43504	0.20975	0.40278	0.4612	0.40739	0.17501
0.45116	0.17121	0.58494	0.81669	0.45462	0.17754	0.48299	0.38714	0.46412	0.21875	0.44728	0.65838	0.44252	0.31679
0.53814	0.27112	0.66356	0.5247	0.4791	0.17956	0.50804	0.16417	0.47334	0.28195	0.46427	0.30571	0.45923	0.68182
0.71238	0.32505	0.83478	0.61011	0.62598	0.82844	0.55686	0.16138	0.54332	0.25627	0.51121	0.2703	0.4791	0.26101
0.82758	0.74787	1.0623	0.71316	0.86502	0.4004	0.7887	0.98194	0.58105	0.30762	0.54808	0.12565	0.56924	0.74544
0.6046	1.13823	1.25556	1.25428	1.32662	1.14236	0.86848	0.54827	0.74118	0.30173	0.74881	0.25494	0.70374	0.28144
1.1638	1.12789	1.34614	1.45948	1.49862	0.90941	1.18203	0.57077	0.93856	0.8151	1.20233	0.83552	1.20896	0.92983
	Note:	EV: estimated value
		MV: measured value
