# Supplementary material for: Radar remote sensing-based inversion model of soil salt content at different depths under vegetation
Source: PeerJ. 2022 Apr 26;10:e13306. doi: 10.7717/peerj.13306 (PMC9053309; doi:10.7717/peerj.13306)
Supplement: Supplemental Information 7 — The measured and estimated values of the soil salt content at seven different depths for the PLSR, QR, ELM and SVM modelling. [file peerj-10-13306-s007.xlsx]

## Sheet: Sheet1
0-10cm					10-20cm					0-20cm					20-40cm					0-40cm					40-60cm					0-60cm
MV	QR	PLSR	ELM	SVM	MV	QR	PLSR	ELM	SVM	MV	QR	PLSR	ELM	SVM	MV	QR	PLSR	ELM	SVM	MV	QR	PLSR	ELM	SVM	MV	QR	PLSR	ELM	SVM	MV	QR	PLSR	ELM	SVM
0.07388	0.08713	0.14514	0.24221	0.18984	0.07547	0.09145	0.28821	0.28821	0.14084	0.07475	0.07993	0.10642	0.18634	0.18984	0.07388	0.07921	0.17644	0.03903	0.06605	0.07014	0.07907	0.21572	0.24306	0.20978	0.07446	0.08684	0.2232	0.24962	0.24361	0.0759	0.09347	0.24741	0.2285	0.18267
0.07792	0.09174	0.26649	0.13834	0.17151	0.0772	0.09448	0.18161	0.18161	0.17687	0.0759	0.09145	0.22672	0.1741	0.17151	0.07633	0.08526	0.19642	0.17931	0.11485	0.07331	0.09145	0.27532	0.20685	0.15935	0.08166	0.09246	0.25353	0.2694	0.02794	0.08915	0.0998	0.17358	0.25981	0.20129
0.08454	0.09404	0.23803	0.0796	0.22048	0.08108	0.10081	0.16314	0.16314	0.20776	0.07763	0.10038	0.11752	0.13416	0.22048	0.07921	0.08987	0.23213	0.17979	0.20858	0.0782	0.09808	0.26711	0.26821	0.22673	0.08684	0.09779	0.22547	0.19033	0.19163	0.09347	0.1024	0.21811	0.22478	0.19811
0.08713	0.09865	0.37095	0.23562	0.18846	0.08324	0.10916	0.37653	0.37653	0.10328	0.07993	0.10124	0.13072	0.2353	0.18846	0.08526	0.10081	0.2582	0.21807	0.07687	0.07907	0.11046	0.27042	0.22348	0.25515	0.09246	0.10902	0.23976	0.2172	0.21312	0.0998	0.10988	0.22954	0.20919	0.2096
0.09174	0.10499	0.33147	0.28794	0.21993	0.09145	0.11089	0.38936	0.38936	0.18186	0.09145	0.10268	0.29367	0.13659	0.21993	0.08987	0.10398	0.16113	0.2305	0.35076	0.09145	0.11363	0.19705	0.26132	0.25394	0.09779	0.11608	0.27069	0.26694	0.65764	0.1024	0.12256	0.24101	0.23025	0.21297
0.09404	0.11075	0.2669	0.33591	0.14253	0.09448	0.11492	0.24791	0.24791	0.20971	0.10038	0.10355	0.19001	0.08278	0.14253	0.10081	0.10744	0.39525	0.3699	0.26239	0.09808	0.1168	0.21806	0.21179	0.16151	0.10902	0.12385	0.37547	0.36581	0.31643	0.10988	0.12716	0.22112	0.22184	0.2417
0.09865	0.1191	0.66514	0.33361	0.25347	0.10081	0.12803	0.12805	0.12805	0.22174	0.10124	0.11075	0.25617	0.28023	0.25347	0.10398	0.11161	0.01754	0.21797	0.22132	0.11046	0.11996	0.19853	0.21385	0.16801	0.11608	0.12673	0.21422	0.25164	0.05393	0.12256	0.13033	0.19005	0.14981	0.19937
0.10499	0.12572	0.22832	0.32195	0.12931	0.10916	0.13264	0.18031	0.18031	0.24098	0.10268	0.11305	0.16298	0.12801	0.12931	0.10744	0.11737	0.02243	0.22513	0.18608	0.11363	0.13206	0.18429	0.17805	0.14444	0.12385	0.1299	0.19946	0.24491	0.20216	0.12716	0.13465	0.24143	0.25475	0.15826
0.11075	0.1384	0.18075	0.237	0.1786	0.11089	0.14214	0.0439	0.0439	0.15399	0.10355	0.13004	0.1651	0.27914	0.1786	0.11161	0.12313	0.15887	0.12637	0.08608	0.1168	0.14358	0.2735	0.17562	0.14554	0.12673	0.13609	0.27441	0.25201	0.25581	0.13033	0.13667	0.24399	0.25434	0.23786
0.1191	0.14099	0.19548	0.27512	0.11925	0.11492	0.14704	0.24229	0.24229	0.22179	0.11075	0.14156	0.1746	0.16274	0.11925	0.11737	0.13379	0.15806	0.10922	0.314	0.11996	0.14646	0.27159	0.26381	0.2243	0.1299	0.14113	0.25907	0.2774	0.27747	0.13465	0.14934	0.46032	0.54655	0.23823
0.12572	0.15481	0.0391	0.10953	0.14627	0.12803	0.16403	0.33963	0.33963	0.12857	0.11305	0.14588	0.17841	0.11439	0.14627	0.12313	0.14286	0.38839	0.24441	0.08109	0.13206	0.15308	0.20859	0.53016	0.25353	0.13609	0.14905	0.26891	0.26235	0.26108	0.13667	0.15856	0.20158	0.19366	0.46194
0.1384	0.16115	0.216	0.17046	0.18365	0.13264	0.16576	0.17831	0.78304	0.24331	0.13004	0.15308	0.15189	0.17739	0.18365	0.13379	0.1492	0.29577	0.39055	0.19783	0.14358	0.17065	0.30479	0.20265	0.19339	0.14113	0.17656	0.2295	0.26411	0.24983	0.14934	0.16547	0.22778	0.19247	0.17491
0.14099	0.1695	0.21286	0.15238	0.17965	0.14214	0.17483	0.35226	0.35226	0.23185	0.14156	0.16288	0.18207	0.15671	0.17965	0.14286	0.16417	0.16634	0.22912	0.16784	0.14646	0.17814	0.27128	0.33719	0.26977	0.14905	0.17929	0.20964	0.24002	0.20539	0.15856	0.17411	0.29774	0.26323	0.18996
0.15481	0.18073	0.84425	0.21461	0.21478	0.14704	0.1839	0.20129	0.20129	0.26199	0.14588	0.16806	0.221	0.1638	0.21478	0.1492	0.17483	0.25913	0.18781	0.0498	0.15308	0.18246	0.189	0.29496	0.21692	0.17656	0.18462	0.19784	0.13847	0.17944	0.16547	0.19484	0.25395	0.26068	0.29932
0.16115	0.18736	0.82084	0.21487	0.16836	0.16403	0.18908	0.25829	0.25829	0.20674	0.15308	0.1767	0.06396	0.13247	0.16836	0.16417	0.18462	0.2332	0.20115	0.22003	0.17065	0.19571	0.23898	0.17778	0.18419	0.17929	0.20262	0.11702	0.22239	0.20138	0.17411	0.20118	0.18669	0.16535	0.25033
0.1695	0.19657	0.4213	0.14573	0.15754	0.16576	0.20608	0.41163	0.41163	0.24417	0.16288	0.18764	0.39176	0.15149	0.15754	0.17483	0.1898	0.21607	0.22961	0.19531	0.17814	0.20579	0.21067	0.2208	0.53377	0.18462	0.20809	0.35842	0.3129	0.28473	0.19484	0.20608	0.37899	0.30246	0.16427
0.18073	0.21356	0.42078	0.25937	0.20487	0.17483	0.2176	0.21034	0.21034	0.15044	0.16806	0.19283	0.39075	0.06374	0.20487	0.18462	0.19556	0.23335	0.24301	0.14265	0.18246	0.21241	0.25113	0.39475	0.61626	0.20262	0.21097	0.18753	0.20438	0.18201	0.20118	0.21414	0.24598	0.22623	0.36717
0.18736	0.2199	0.14252	0.24287	0.40182	0.1839	0.22465	0.28603	0.28603	0.35984	0.1767	0.19859	0.25318	0.40166	0.40182	0.1898	0.20982	0.2364	0.2233	0.13863	0.19571	0.21875	0.9294	0.29223	0.25539	0.20809	0.2176	0.24177	0.23173	0.22277	0.20608	0.2248	0.15374	0.29034	0.20033
0.19657	0.23516	0.69219	0.18317	0.41585	0.18908	0.23761	0.05937	0.05937	0.21215	0.18764	0.21472	0.36673	0.39227	0.41585	0.19556	0.21961	0.2475	0.16121	0.21846	0.20579	0.23228	0.35847	0.28413	0.23867	0.21097	0.22523	0.12701	0.27726	0.29034	0.21414	0.23344	0.42199	0.43039	0.20993
0.21356	0.25014	0.64604	0.27585	0.18229	0.20608	0.25648	0.44239	0.44239	0.16687	0.19283	0.23344	0.14688	0.29278	0.18229	0.20982	0.22883	0.3687	0.21398	0.10422	0.21241	0.2392	0.23439	0.46266	0.28744	0.2176	0.23704	0.208	0.2528	0.21059	0.2248	0.24064	0.42143	0.44397	0.38169
0.2199	0.26454	0.71516	0.28859	0.38656	0.2176	0.26598	0.30249	0.30249	0.08764	0.19859	0.24006	0.35051	0.34216	0.38656	0.21961	0.23473	0.1752	0.21624	0.13681	0.21875	0.25936	0.23391	0.46007	0.20789	0.22523	0.25777	0.31442	0.27441	0.27636	0.23344	0.26425	0.26277	0.3299	0.38453
0.23516	0.28902	0.1986	0.27345	0.20242	0.22465	0.29118	0.30695	0.30695	0.45927	0.21472	0.26166	0.13848	0.16567	0.20242	0.22883	0.2366	0.2318	0.23024	0.14782	0.23228	0.27088	0.19342	0.22798	0.21243	0.23704	0.27174	0.30095	0.27713	0.28083	0.24064	0.27923	0.53162	0.68581	0.30867
0.25014	0.29766	0.26576	0.02799	0.15914	0.23761	0.31292	0.16843	0.16843	0.23519	0.23344	0.27779	0.43073	0.32434	0.15914	0.23473	0.2631	0.33634	0.41595	0.24015	0.2392	0.27577	0.17851	0.63348	0.08636	0.25777	0.2991	0.36456	0.31619	0.28155	0.26425	0.29737	0.35668	0.31305	0.56999
0.26454	0.30428	0.35894	0.17659	0.30732	0.25648	0.33769	0.32018	0.32018	0.17486	0.24006	0.31033	0.11607	0.30295	0.30732	0.2366	0.27606	0.42871	0.29427	0.13825	0.25936	0.29334	0.03462	0.3182	0.15421	0.27174	0.30659	0.10202	0.29015	0.29558	0.27923	0.30947	0.22743	0.24318	0.32198
0.28902	0.33654	0.37304	0.27945	0.21514	0.26598	0.3544	0.29017	0.29017	0.21119	0.26166	0.3112	0.21136	0.42095	0.21514	0.2631	0.31998	0.1217	0.23391	0.18962	0.27088	0.31724	0.44258	0.23118	0.24803	0.2991	0.31264	0.31758	0.31764	0.28916	0.29737	0.33683	0.39515	0.45431	0.21869
0.29766	0.37196	0.31805	0.27103	0.32145	0.29118	0.37369	0.33909	0.33909	0.2307	0.27779	0.34115	0.47033	0.12128	0.32145	0.27606	0.34043	0.28704	0.29903	0.25371	0.27577	0.35468	0.35424	0.44324	0.28974	0.30659	0.32344	0.29412	0.32506	0.25292	0.30947	0.34806	0.2464	0.24189	0.39068
0.30428	0.37888	0.1807	0.38234	0.17792	0.31292	0.42049	0.31144	0.31144	0.23711	0.31033	0.3495	0.18997	0.226	0.17792	0.31998	0.35036	0.21697	0.21744	0.31754	0.29334	0.37657	0.50034	0.24477	0.28865	0.31264	0.36606	0.23602	0.35938	0.30492	0.33683	0.35468	0.33353	0.29829	0.24996
0.33654	0.39328	0.72629	0.32497	0.60428	0.33769	0.4372	0.18259	0.18259	0.19788	0.3112	0.41286	0.27723	0.48709	0.60428	0.34043	0.37009	0.1872	0.15462	0.21307	0.31724	0.395	0.20798	0.3276	0.31262	0.32344	0.37499	0.24484	0.26998	0.45255	0.34806	0.37801	0.21037	0.18693	0.2967
0.37196	0.4215	0.36259	0.18359	0.05956	0.3544	0.48529	0.228	0.228	0.18059	0.34115	0.43734	0.26011	0.20157	0.05956	0.35036	0.40868	0.18767	0.24644	0.38714	0.35468	0.43504	0.2696	0.18748	0.20975	0.36606	0.39083	0.5267	0.46415	0.4612	0.35468	0.39385	0.26939	0.31872	0.97501
0.37888	0.45116	0.43166	0.91916	0.17754	0.37369	0.58494	0.35887	0.35887	0.81669	0.3495	0.45462	0.12067	0.32526	0.17754	0.37009	0.43475	0.29936	0.36265	0.38714	0.37657	0.46412	0.38867	0.2862	0.21875	0.37499	0.40278	0.26477	0.26164	0.65838	0.37801	0.40739	0.96779	1.02768	0.31679
0.39328	0.53814	0.24091	0.27628	0.17956	0.42049	0.66356	0.57665	0.17665	0.5247	0.41286	0.4791	0.23109	0.2842	0.17956	0.40868	0.48299	0.25147	0.15994	0.16417	0.395	0.47334	0.26709	0.03963	0.28195	0.39083	0.44728	0.40813	0.37921	0.30571	0.39385	0.44252	0.318	0.30301	0.68182
0.4215	0.71238	1.19873	0.39195	0.82844	0.4372	0.83478	0.41238	0.62378	0.61011	0.43734	0.62598	0.15819	0.50562	0.82844	0.43475	0.50804	0.5827	0.26188	0.16138	0.43504	0.54332	0.41052	0.3278	0.25627	0.40278	0.46427	0.23214	0.26897	0.2703	0.40739	0.45923	0.8221	1.1291	0.26101
0.45116	0.82758	0.21276	0.32051	0.4004	0.48529	1.0623	0.37916	0.37916	0.71316	0.45462	0.86502	0.24019	0.63558	0.4004	0.48299	0.55686	0.545	0.274	0.28194	0.46412	0.58105	0.51856	0.60728	0.30762	0.44728	0.51121	0.27398	0.25321	0.12565	0.44252	0.4791	0.29315	0.27029	0.74544
0.53814	1.19046	0.40274	0.7371	1.14236	0.58494	1.25556	0.65882	1.15882	1.25428	0.4791	1.1271	0.22762	1.10634	1.14236	0.50804	0.7887	0.29623	0.23467	0.54827	0.47334	0.74118	0.38002	0.27562	0.30173	0.46427	0.54808	0.26735	0.25534	0.25494	0.45923	0.56924	0.37959	0.43193	0.28144
1.1638	1.21638	1.06179	1.2475	0.90941	1.34614	1.34614	0.95549	1.25549	1.45948	1.32662	1.21001	0.44115	1.20579	0.90941	0.86848	0.86848	0.3911	0.39987	0.57077	0.54332	0.93856	0.42187	0.43388	0.8151	0.51121	0.74881	0.42415	0.40214	0.53552	0.4791	0.70374	0.5692	0.6346	0.92983
																				0.93856	1.39782	0.62427	1.39782	1.25955	1.20233	0.99392	0.48934	0.42912	0.70369	1.20896	0.96006	0.44595
												Note: MV: measured value
